# Supplementary material for: Distinct Feedforward and Intrinsic Neurons in Posterior Inferotemporal Cortex Revealed by in Vivo Connection Imaging
Source: PubMed Central journal article supplement — Sci Rep. 2012 Dec 6;2:934. doi: 10.1038/srep00934 (PMC3515805; doi:10.1038/srep00934), 2012-12-06
Supplement: srep00934-s1.pdf [file srep00934-s1.pdf]

## Supplementary Information

### **Distinct Feedforward and Intrinsic Neurons in Posterior Inferotemporal Cortex Revealed by *in Vivo* Connection Imaging**

Noritaka Ichinohe<sup>1,2,\*</sup>, Elena Borra<sup>2</sup> and Kathleen Rockland<sup>2</sup>

<sup>1</sup>Department of Ultrastructural Research, National Institute of Neuroscience, National Center of Neurology and Psychiatry, Kodaira, Tokyo 187-8502, Japan

<sup>2</sup>Laboratory for Cortical Organization and Systematics, RIKEN Brain Science Institute, Wako City, Saitama 351-0198, Japan

Inventory of Supplemental Information:

Supplementary information A: **What we are looking at in our *in vivo* SCI.**

Supplementary information B: **Size and distribution of retrograde and anterograde patches.**

Supplementary Information C: **Another potential application of our *in vivo* SCI.**

Supplementary Figure S1 : **Plotted coronal sections of M2.**

Supplementary Figure S2: **Spatial relationship among one feedforward projection (red) and two intrinsic networks (green and silver) in M2. Color-coded flat maps of red, blue, silver neurons, and their combinations.**

Supplementary Figure S3: **Plotted coronal sections of M3.**

Supplementary Figure S4: **Spatial relationship among one feedforward projection (red) and two intrinsic networks (green and silver) in M3. Color-coded flat maps of red, blue, silver neurons, and their combinations.**

Supplementary Figure S5: **SCI after perfusion with experiment of DiI placement.**

Supplementary Figure S6: **Results of an injection of a mixture of three CTB conjugates (CTB-Alexa 488, -Alexa 555, and -gold).**

Supplementary Table S1: **Size of each patch for each tracer in TEO of each monkey.**

Supplementary Table S2: **Summary of size of patches for each tracer in TEO of each monkey.**

Supplementary Table S3: **Summary of center-to-center distance in TEO of each monkey.**

Supplementary Table S4: **Correlation coefficient between numbers of neurons of two colours within each pixel in all whole TEO.**

Supplementary Table S5: **Number of CTB-Alexa 488 and/or -Alexa 555 labeled neurons around CTB-Alexa 488 injection sites on the sections through middle of injection sites**

Supplementary Table S6: **Summary of labeled neurons in each patch and pixel of TEO in M1**

Supplementary Table S7: **Summary of labeled neurons in each patch and pixel of TEO in M2.**

Supplementary Table S8: **Summary of labeled neurons in each patch and pixel of TEO in M3.**

Supplementary Table S9: **Summary of Experiments.**

## Supplementary Information A

**What we are looking at in our *in vivo* SCI.** Because TEO is convoluted in shape, some distortion is inevitable in a 2-dimensional unfolded flat-map. To confirm that *in vivo* and histological patches corresponded, we used DiI (Sigma-Aldrich, St. Louis, MO) in the postmortem brain to mark what had been identified as fluorescent spots *in vivo*. First, to avoid washing out of DiI crystal, after perfusion, the fixed brain was removed and the surface was imaged by fluorescence microscopy, using a filter for red fluorescent protein at a magnification of 5–20×. Patches of red fluorescence were observed within both V4 and TEO, within a triangle bound by the STS, posterior middle temporal sulcus (PMTS), and inferior occipital sulcus (IOS) (case M4 in Supplementary Fig. S5). Second, we locally applied DiI (10% in EtOH) with an electrode tip at the brain surface overlying the fluorescent patches (six positions in TEO and three positions in V4, arrows in Supplementary Fig. S5, white and yellow asterisks in Supplementary Fig. S5). Areas without fluorescence were also marked (three positions in TEO: blue asterisks in Supplementary Fig. S5). Third, brain blocks containing the DiI-labeled areas, including TEO and V4, were cut into coronal sections of 50  $\mu\text{m}$  thicknesses. DiI placed on the fluorescent patches always corresponded to histologically visualized CTB-Alexa555-labeled neurons (red neurons; Supplementary Fig. S5d). We noted that the territories occupied by CTB-Alexa555-labeled neurons in the deep layers were sometimes wider than those in the upper layers. Because of this asymmetry and because the deeper CTB-Alexa555-labeled neurons appeared not to be visible from the surface (Fig. Supplementary S5), we concluded that infragranular neurons do not contribute to the patches of fluorescence at the brain surface. When DiI was placed on areas without

fluorescence, as a control, there were only a few (2-3) underlying CTB-Alexa555-labeled red neurons (Supplementary Fig. S5; blue asterisks).

In another control, we compared the efficacy of the different retrograde tracers within the TE–TEO system by injecting all three tracers at the same site in M5. This resulted in a dense field of triple labeled cells (Supplementary Fig. S6). Therefore, we can conclude that all three tracers were similarly efficient in the TEO–TE system, and did not interfere with each other.

### **Supplementary Information B**

**Size and distribution of retrograde and anterograde patches.** In general, in TEO the number of green and silver patches in our material was less than the number of patches revealed in other studies by anterograde tracer (anterograde patches: more than 25 patches)<sup>1</sup>. Our retrograde patches were 2 times greater in diameter than was reported for anterograde patches (~0.5  $\mu\text{m}$  diameter), about 4 times larger in area than the anterograde patches<sup>1</sup>, and the distance between green patches and between silver patches was about twice that for anterograde patches<sup>1</sup>. The parameters of our retrogradely based patches in TEO are, however, similar to what has been reported in other studies with retrograde tracer<sup>2</sup>.

### References

1. Fujita, I. & Fujita, T. Intrinsic Connections in the macaque inferior temporal cortex. *J. Comp. Neurol.* 368, 467-486 (1996).

2. Felleman, D.J., Xiao, Y. & McClendon, E. Modular organization of occipito-temporal pathways: cortical connections between visual area 4 and visual area 2 and posterior inferotemporal ventral area in macaque monkeys. *J. Neurosci.* 17, 3185-3200 (1997).

### **Supplementary Information C**

**Another potential application of our *in vivo* SCI.** In this study, we developed an *in vivo* SCI method. There are several noninvasive methods for *in vivo* connection imaging, including enhanced magnetic resonance imaging (e.g., manganese, CTB-conjugated tracers)<sup>1,2</sup>, but columnar or laminar resolution is so far not optimal with these approaches. In our method, the retrograde patches and the fine network of cortical blood vessels were used as a high-resolution grid (~ less than 100  $\mu\text{m}$ ) to guide tracer injections or other needle-like apparatuses (e.g., electrophysiological electrodes, viral vector injections, or light apparatuses for optogenetics).

There have been several previous attempts to develop a way to visualize connectional assemblies *in vivo*. Malach used a different fluorescent tracer, with some problems of toxicity<sup>3</sup>. Jarosiewicz et al.<sup>4</sup> used CTB-Alexa555 and Alexa594 combined with two photon Ca imaging to discriminate projection-target specific neuron response properties in cat visual cortex<sup>4</sup>. However, their cranial window was limited (250 x 250  $\mu\text{m}^2$ ), and not suitable for visualization of long distance projections. Wang et al. (2007) used anterograde tracers (Fluoro-Ruby and Fluoro-Emerald) to visualize and record from mouse V2<sup>5</sup>. Our method can similarly be used for electrophysiological studies, with simultaneous recordings from two spots connected by patchy dense connections.

Our *in vivo* SCI method can also be used for targeting projection-specific gene expression. Recently, highly efficient retrograde-transport viral vectors<sup>6,7</sup> have become available, and the combination of these retrograde viral vectors and other vectors or agents (e.g., Tet-on systems and immunotoxin)<sup>8,9</sup> allow, for example, induction of projection-specific gene expression (e.g., transmission-inhibiting tetanus toxin<sup>8</sup> and genes such as brain-derived neurotrophic factor), or destruction of projection-specific neurons<sup>9</sup>. As shown here, our *in vivo* SCI method allows visualization of strongly interconnected areas, which can then be injected with different types of vectors or agents to maximize double infections in specific connections.

#### References

1. Saleem KS, Pauls JM, Augath M, Trinath T, Prause BA, Hashikawa T, Logothetis NK. Magnetic resonance imaging of neuronal connections in the macaque monkey. *Neuron* 34, 685-700 (2002).
2. Wu, C.W., Vasalatiy, O., Liu, N., Wu, H., Cheal, S., Chen, D.Y., Koretsky, A.P., Griffiths, G.L., Tootell, R.B. & Ungerleider, L.G. Development of a MR-visible compound for tracing neuroanatomical connections in vivo. *Neuron* 70, 229-243 (2011).
3. Malach, R. *In vivo* visualization of callosal pathways: a novel approach to the study of cortical organization. *J. Neurosci. Methods* 25, 225-238 (1988).
4. Jarosiewicz, B., Schummers, J., Malik, W.Q., Brown, E.N. & Sur, M. Functional biases in visual cortex neurons with identified projections to higher cortical targets. *Curr. Biol.* 22, 269-277 (2012).
5. Wang, Q., Gao, E. & Burkhalter, A. *In vivo* transcranial imaging of connections in

mouse visual cortex. *Journal of Neuroscience Methods* 159, 268–276 (2007).

6. Kato, S., Kobayashi, K., Inoue, K., Kuramochi, M., Okada, T., Yaginuma, H., Morimoto, K., Shimada, T., Takada, M., & Kobayashi, K. A lentiviral strategy for highly efficient retrograde gene transfer by pseudotyping with fusion envelope glycoprotein. *Hum. Gene Ther.* 22, 197-206 (2011)..

7. Kato, S., Kuramochi, M., Takasumi, K., Kobayashi, K., Inoue, K., Takahara, D., Hitoshi, S., Ikenaka, K., Shimada, T., Takada, M. & Kobayashi, K. Neuron-specific gene transfer through retrograde transport of lentiviral vector pseudotyped with a novel type of fusion envelope glycoprotein. *Hum. Gene Ther.* 22, 1511-1523 (2011).

8. Kinoshita, M., Matsui, R., Kato, S., Hasegawa, T., Kasahara, H., Isa, K., Watakabe, A., Yamamori, T., Nishimura, Y., Alstermark, B., Watanabe, D., Kobayashi, K. & Isa T. Genetic dissection of the circuit for hand dexterity in primates. *Nature* 487, 235-238 (2012).

9. Inoue, K., Koketsu, D., Kato, S., Kobayashi, K., Nambu, A. & Takada M. Immunotoxin-mediated tract targeting in the primate brain: selective elimination of the cortico-subthalamic "hyperdirect" pathway. *PLoS One* 7, e39149 (2012).

**Supplementary Figure S1| Plotted coronal sections of M2.** (a) Coronal section lines superimposed on *in vivo* SCI, and corresponding to the tissue sections in b. (b) Plots of labeled neurons, in coronal sections (only ventral portion is shown) from the field shown in (a). Red, green and blue circles represent red, green and silver neurons. Plotting was limited to TEO. Arrows point to injection sites of green and silver tracers. Arrowhead at upper left section points to the overlapping patch shown at higher magnification in (c). (c) Intermingled red and green neurons from the arrowhead in (b). Scale bar represents 1 mm (a), 1.5 mm (b), 250  $\mu$ m (c).

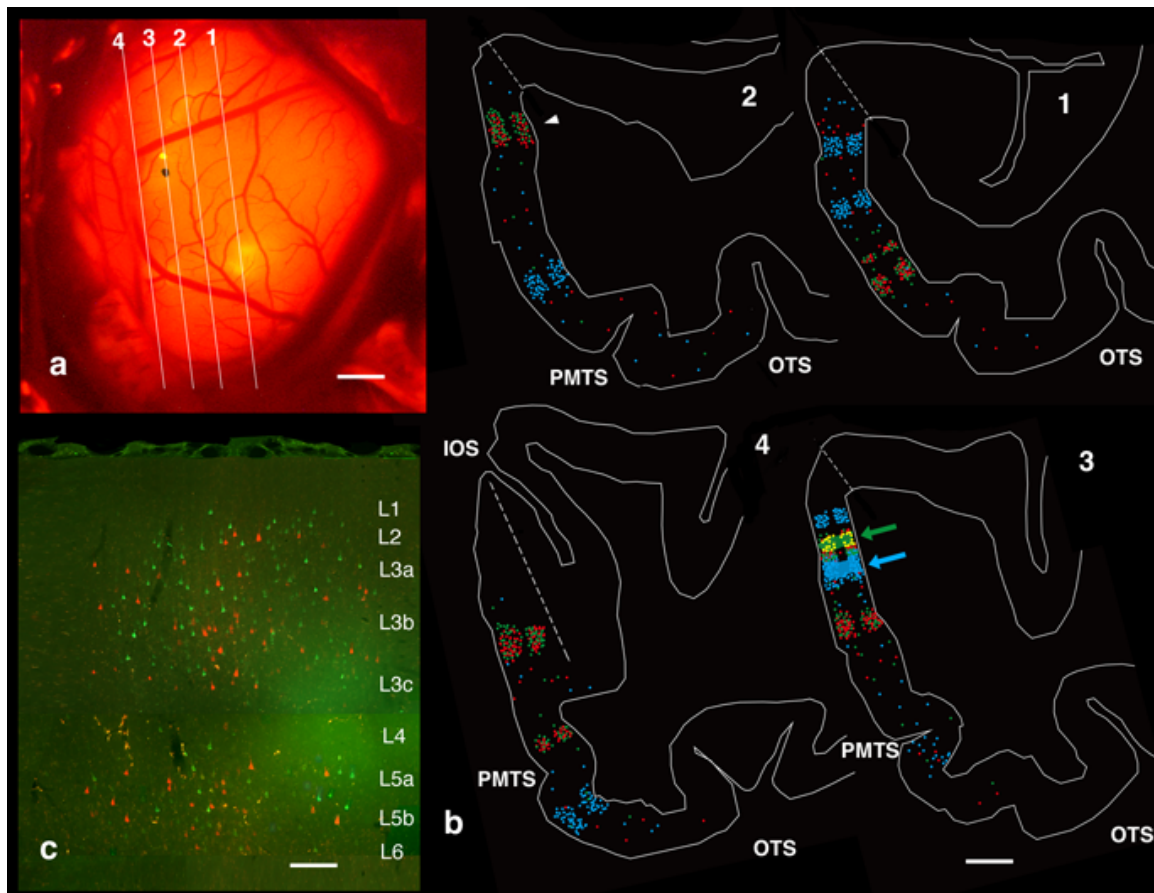

**Supplementary Figure S2| Spatial relationship of one feedforward projection (red) and two intrinsic networks (green and silver) in M2, shown as flat map. Color-coded flat maps of red (a) and green neurons (b), and their merge (c), silver neurons, colorized to blue for the sake of better contrast (d), merge of red and silver (shown as blue) neurons (e) and merge of green and blue neurons (f). CTB-Alexa488 injection sites are yellow filled circle in b, c, and f, and CTB-Gold are purple dots in d, e, and f. For abbreviations, scale bar and Heat map scale of density of a pixel, see fig. 4.**

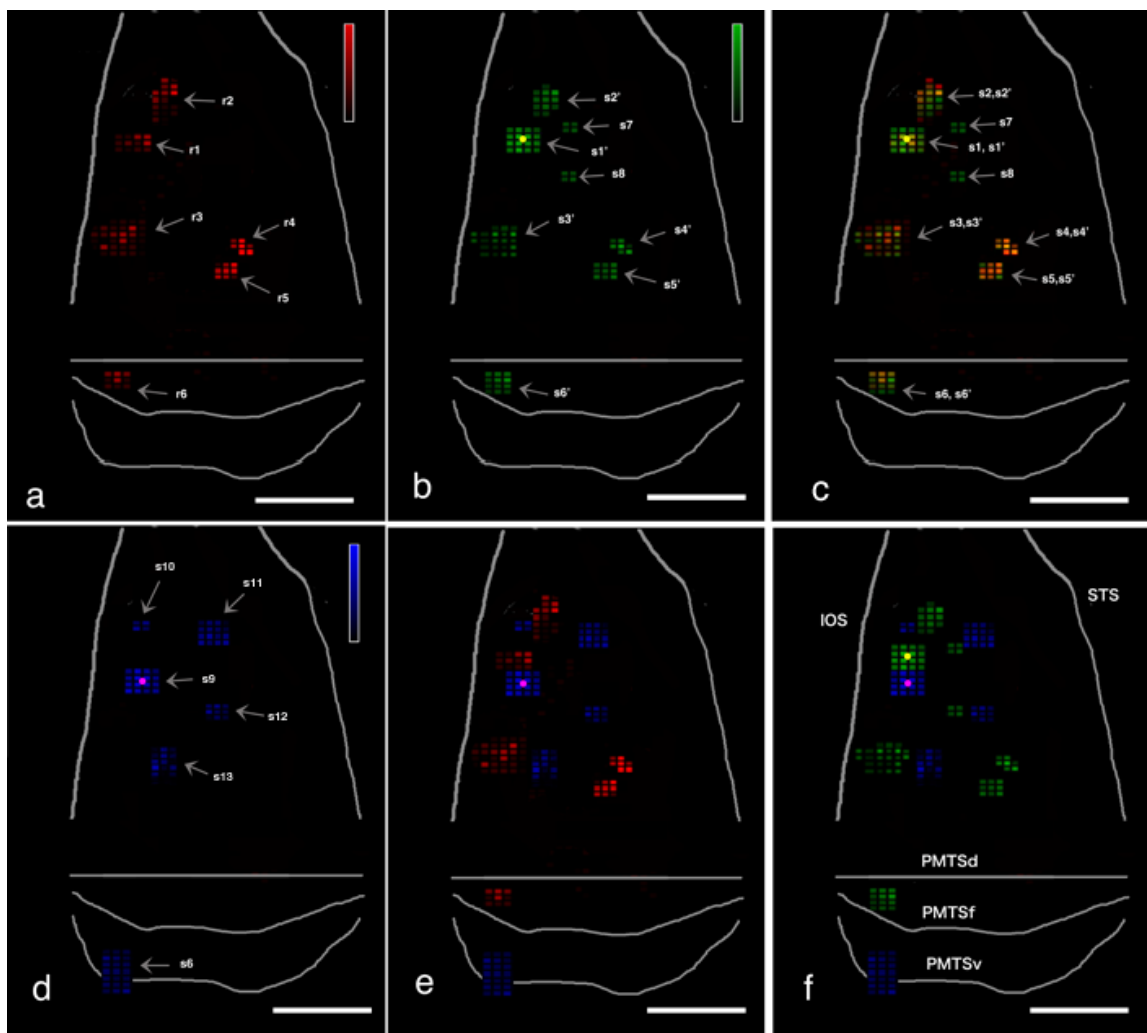



**Supplementary Figure S3| Plotted coronal sections of M3.** (a) Coronal section lines superimposed on *in vivo* SCI, and corresponding to the tissue sections in b. (b) Plots of labeled neurons, in coronal section (only ventral is shown) from the field shown in (a). Red, green and blue circles represent red, green and silver neurons. Plotting was limited to TEO. Arrows point to injection sites of green and silver (shown as blue) tracers. Scale bar represents 1 mm (a), 500  $\mu$ m (b).

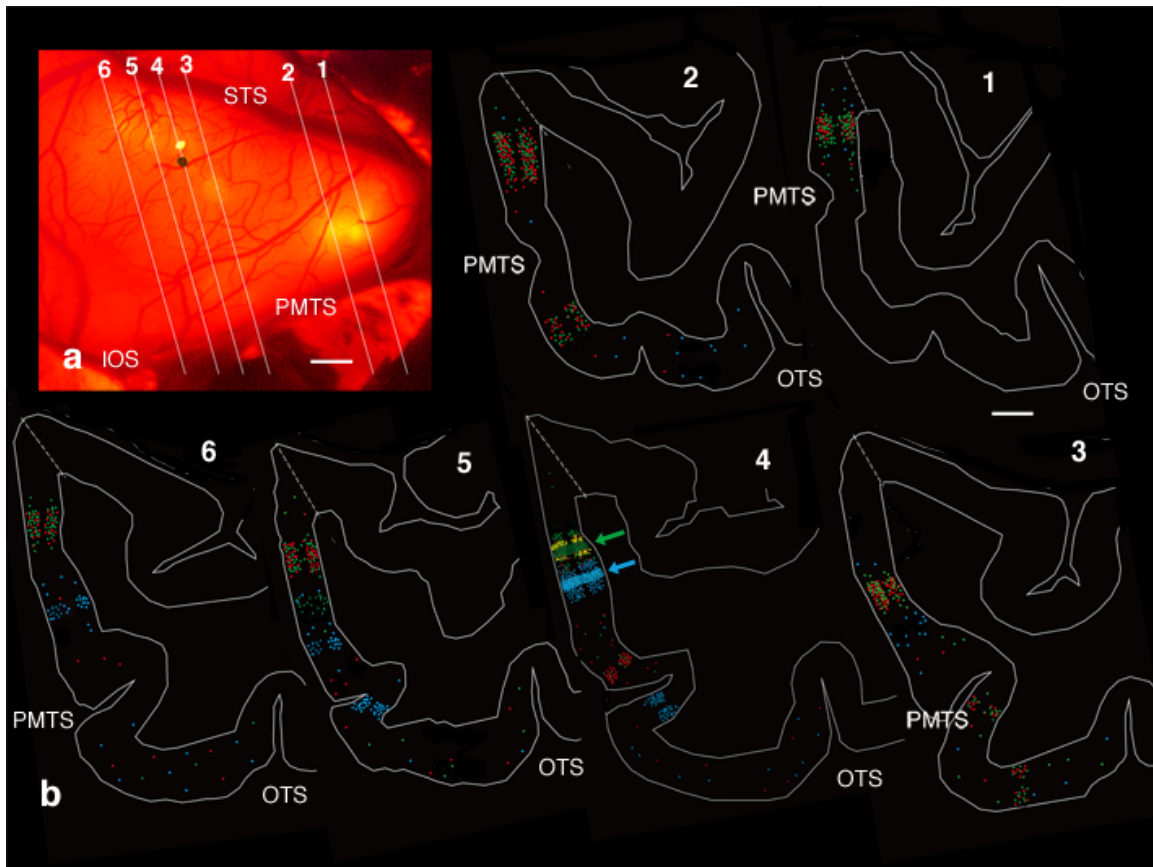

**Supplementary Figure S4| Spatial relationship of one feedforward projection (red) and two intrinsic networks (green and silver) in M3, shown as flat map.** Color-coded flat maps of red (a) and green neurons (b), and their merge (c); silver neurons (expressed as blue) (d), merge of red and silver (blue) neurons (e), and merge of green and silver (blue) neurons (f). CTB-Alexa488 injection sites are yellow filled circle in b, c, and f, and CTB-Gold are purple dots in d, e, and f. For abbreviations, scale bar and Heat map scale of density of a pixel, see fig. 4.

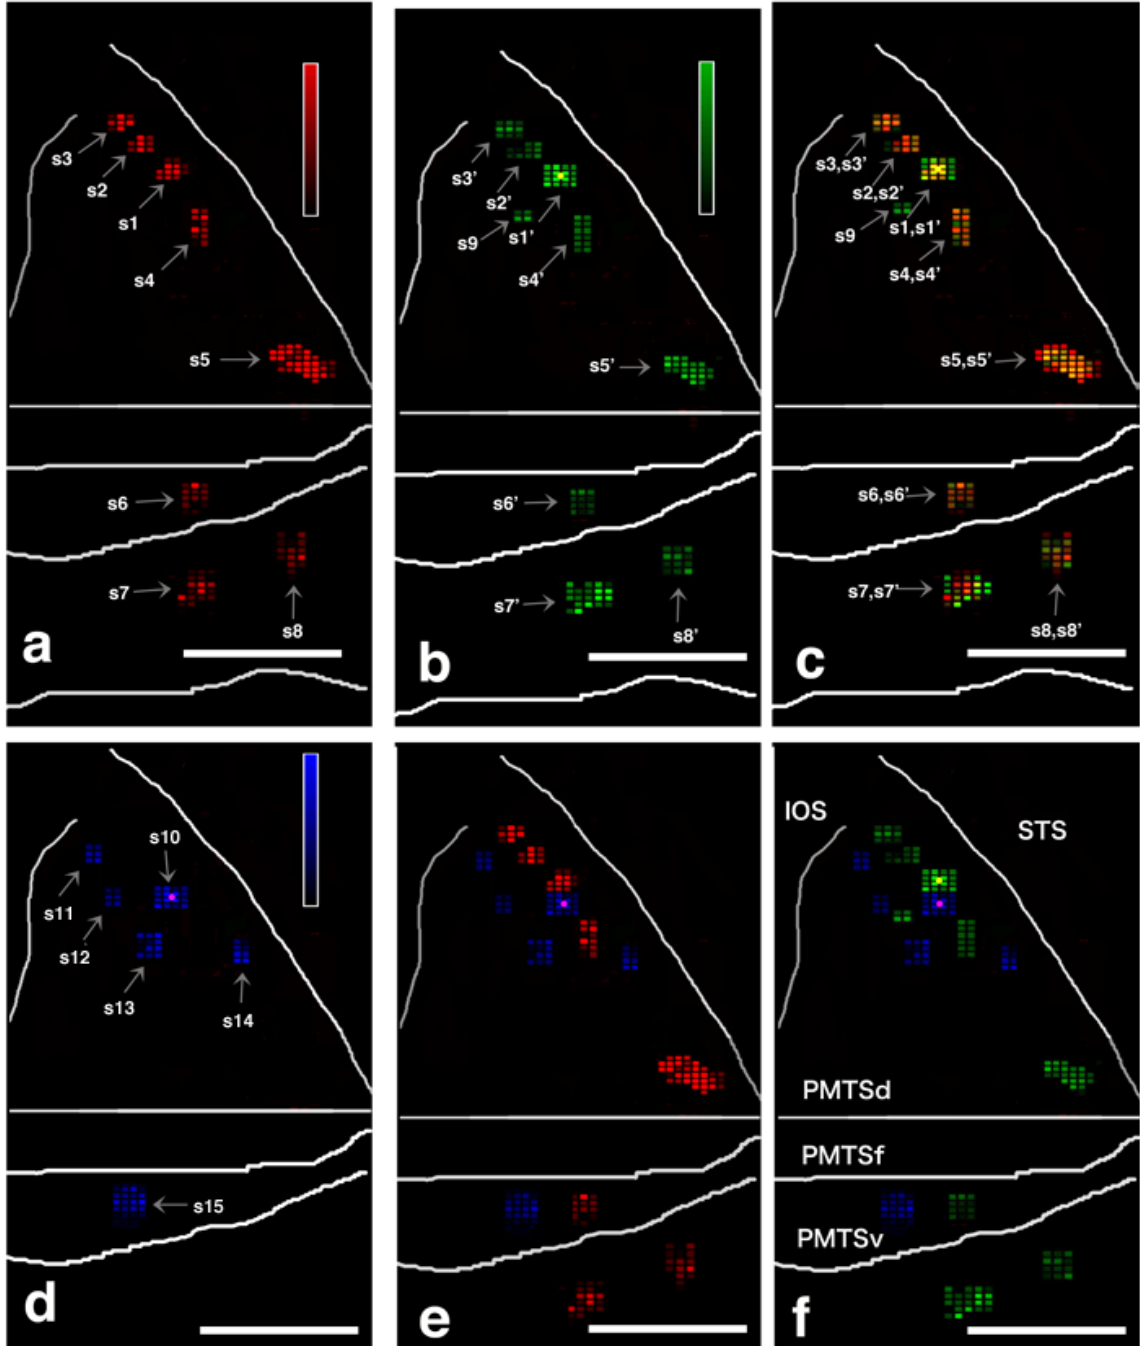

**Supplementary Figure S5| SCI of a perfused postmortem brain, prepared for DiI placement.** (a) An example of fluorescent SCI of the fixed brain (M4). The injection site of CTB-Alexa555 (arrow) is surrounded by a bright fluorescent halo. The rectangle indicates the area containing fluorescent spots in TEO and part of V4. (b) An enlarged image of the spots (at arrows). (c) The same image as (b). The asterisks represent the positions of DiI application (white and yellow asterisks = DiI positioned on fluorescence spots, and blue asterisks = DiI positioned off fluorescence spots). (d) Coronal section through the DiI application site (yellow asterisk) in c. Under the DiI-labeled patch, there are numerous CTB-Alexa555-labeled neurons. Note that the neurons are more widespread in the lower layers. Abbreviations: IOS, inferior occipital sulcus; L4, layer 4; LF, lateral fissure; LuS, lunate sulcus; PMTS, posterior middle-temporal sulcus; STS, superior temporal sulcus; TE, area TE; TEO, area TEO; V4, area V4; WM, white matter. Scale bar represent 1 mm (a), 200  $\mu$ m (b, c), and 50  $\mu$ m (d).

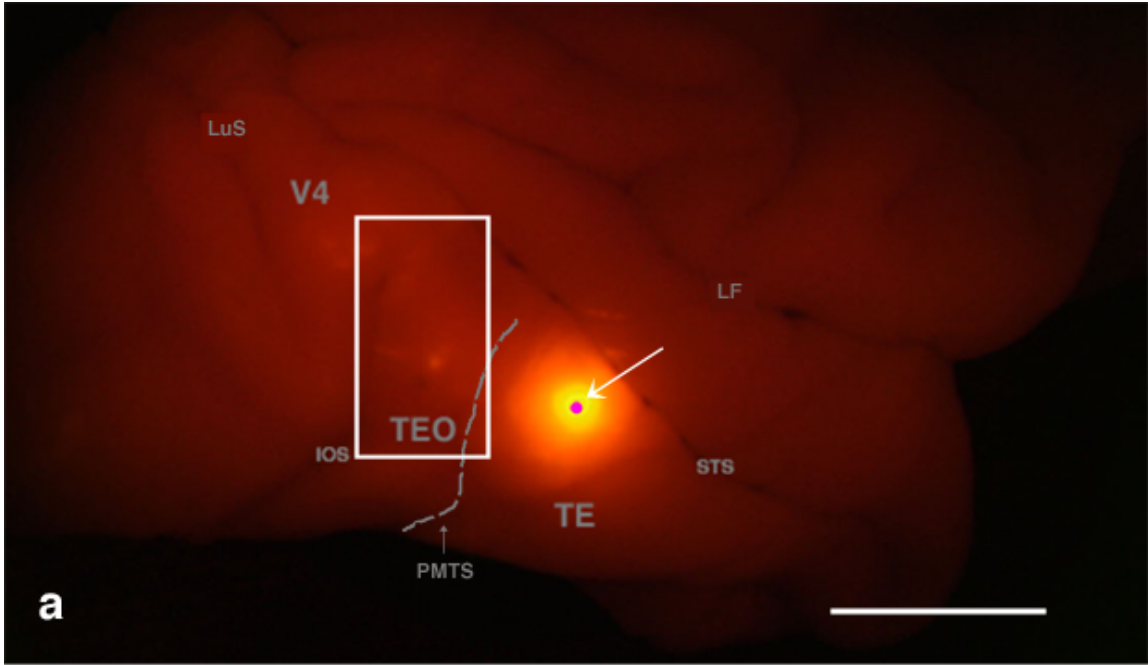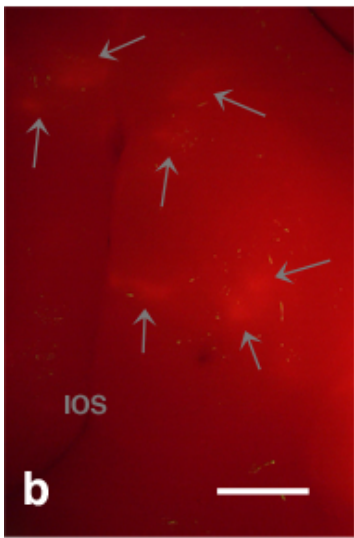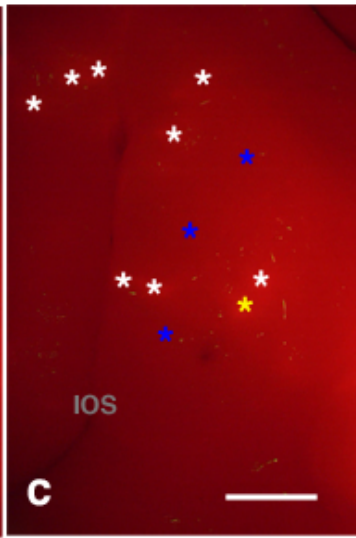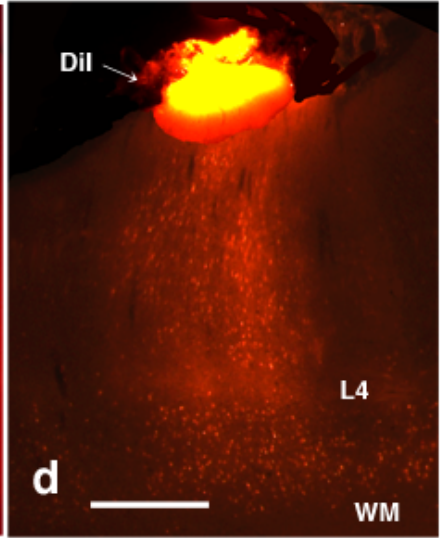

**Supplementary Figure 6| Results of an injection of a mixture of three CTB conjugates (CTB-Alexa488, -Alexa555, and -gold).** (a) Photograph of a field of CTB-Alexa488-labeled neurons, at 5 mm from the injection site, (b) Same, for CTB-Alexa555, (c) Same, for pseudo-coloured (blue) CTB-gold enhanced by silver, (d) Merged image of (a), (b) and (c). Scale Bar represents 100  $\mu\text{m}$ .

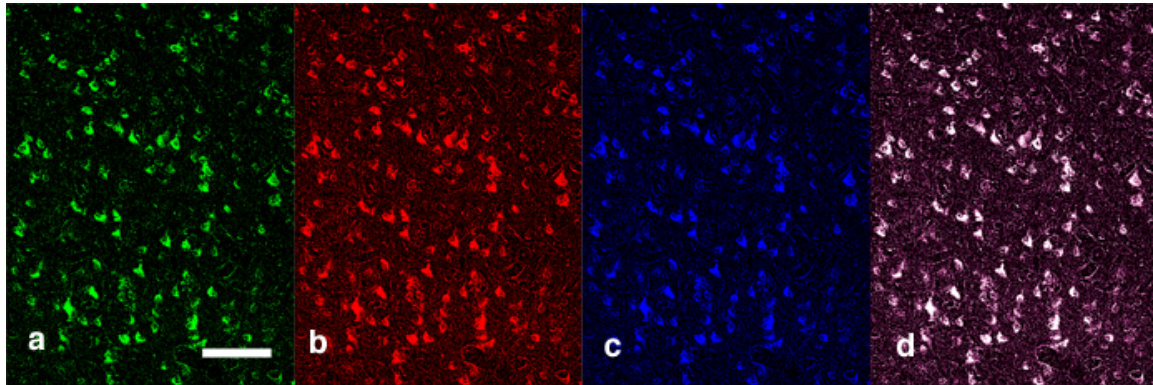

**Supplementary Table S1. Size of patch size for each tracer in TEO of M1, M2, M3**

| M1                       |      |      |      |      |      |     |      |      |      |      |
|--------------------------|------|------|------|------|------|-----|------|------|------|------|
| red*(patch#=9)           | r1   | r2   | r3   | r4   | r5   | r6  | r7   | r8   | r9   |      |
| X axis (mm) <sup>±</sup> | 2.5  | 0.75 | 0.75 | 0.5  | 1.5  | 1.0 | 0.75 | 0.5  | 1.0  |      |
| Y axis (mm) <sup>±</sup> | 2.75 | 1.25 | 0.75 | 1.0  | 1.5  | 0.5 | 1.5  | 1.5  | 1.25 |      |
| Area (mm <sup>2</sup> )  | 6.75 | 3.75 | 0.75 | 2.25 | 1.0  | 1.0 | 1.25 | 1.0  | 1.0  |      |
| green*(patch#=10)        | g1   | g2   | g3   | g4   | g5   | g6  | g7   | g8   | g9   | g10  |
| X axis (mm) <sup>±</sup> | 2.5  | 0.75 | 0.75 | 0.5  | 1.5  | 1.0 | 0.75 | 0.5  | 1.0  | 0.5  |
| Y axis (mm) <sup>±</sup> | 2.75 | 1.25 | 0.75 | 1.0  | 1.5  | 0.5 | 1.5  | 1.5  | 1.25 | 0.5  |
| Area (mm <sup>2</sup> )  | 6.75 | 3.75 | 0.75 | 2.25 | 1.0  | 1.0 | 1.25 | 1.0  | 1.0  | 0.06 |
| silver*(patch#=8)        | s1   | s2   | s3   | s4   | s5   | s6  | s7   | s8   |      |      |
| X axis (mm) <sup>±</sup> | 1.0  | 0.75 | 0.75 | 0.75 | 0.75 | 0.5 | 0.5  | 0.75 |      |      |
| Y axis (mm) <sup>±</sup> | 1.0  | 1.0  | 1.0  | 1.25 | 1.0  | 1.5 | 0.75 | 1.0  |      |      |
| Area (mm <sup>2</sup> )  | 1.0  | 1.0  | 0.6  | 0.6  | 0.5  | 0.7 | 0.4  | 0.5  |      |      |

  

| M2                       |     |      |      |      |      |      |      |      |  |  |
|--------------------------|-----|------|------|------|------|------|------|------|--|--|
| red*(patch#=6)           | r1  | r2   | r3   | r4   | r5   | r6   |      |      |  |  |
| X axis (mm) <sup>±</sup> | 1.0 | 0.75 | 1.5  | 0.75 | 0.75 | 0.75 |      |      |  |  |
| Y axis (mm) <sup>±</sup> | 1.0 | 1.75 | 1.5  | 0.75 | 0.75 | 0.75 |      |      |  |  |
| Area (mm <sup>2</sup> )  | 1.0 | 2.0  | 2.75 | 1.0  | 1.13 | 1.5  |      |      |  |  |
| green*(patch#=8)         | g1  | g2   | g3   | g4   | g5   | g6   | g7   | g8   |  |  |
| X axis (mm) <sup>±</sup> | 1.0 | 0.75 | 1.5  | 0.75 | 0.75 | 0.75 | 0.5  | 0.5  |  |  |
| Y axis (mm) <sup>±</sup> | 1.0 | 1.75 | 1.5  | 0.75 | 0.75 | 0.75 | 0.5  | 0.5  |  |  |
| Area (mm <sup>2</sup> )  | 1.0 | 2.0  | 2.75 | 1.0  | 1.13 | 1.5  | 0.25 | 0.25 |  |  |
| silver*(patch#=6)        | s1  | s2   | s3   | s4   | s5   | s6   |      |      |  |  |
| X axis (mm) <sup>±</sup> | 1.0 | 0.5  | 1.0  | 0.75 | 0.75 | 0.75 |      |      |  |  |
| Y axis (mm) <sup>±</sup> | 1.0 | 0.5  | 1.0  | 0.5  | 1.25 | 0.75 |      |      |  |  |
| Area (mm <sup>2</sup> )  | 1.0 | 0.25 | 1.0  | 0.6  | 0.75 | 1.31 |      |      |  |  |

  

| M3                       |     |      |      |      |      |      |      |      |      |  |
|--------------------------|-----|------|------|------|------|------|------|------|------|--|
| red*(patch#=8)           | r1  | r2   | r3   | r4   | r5   | r6   | r7   | r8   |      |  |
| X axis (mm) <sup>±</sup> | 1.0 | 0.75 | 0.75 | 0.50 | 2.0  | 0.75 | 1.0  | 0.75 |      |  |
| Y axis (mm) <sup>±</sup> | 1.0 | 0.75 | 0.75 | 2.0  | 1.75 | 1.25 | 1.5  | 1.5  |      |  |
| Area (mm <sup>2</sup> )  | 1.0 | 2.0  | 2.75 | 1.0  | 1.13 | 1.5  |      |      |      |  |
| green*(patch#=9)         | g1  | g2   | g3   | g4   | g5   | g6   | g7   | g8   | g9   |  |
| X axis (mm) <sup>±</sup> | 1.0 | 0.75 | 0.75 | 0.75 | 0.75 | 0.75 | 0.75 | 0.75 | 0.5  |  |
| Y axis (mm) <sup>±</sup> | 1.0 | 0.75 | 0.75 | 0.75 | 0.75 | 0.75 | 0.75 | 0.75 | 0.5  |  |
| Area (mm <sup>2</sup> )  | 1.0 | 2.0  | 2.75 | 1.0  | 1.13 | 1.5  | 0.25 | 0.25 | 0.25 |  |
| silver*(patch#=6)        | s1  | s2   | s3   | s4   | s5   | s6   |      |      |      |  |
| X axis (mm) <sup>±</sup> | 1.0 | 0.5  | 0.5  | 0.75 | 0.5  | 1.0  |      |      |      |  |
| Y axis (mm) <sup>±</sup> | 1.0 | 0.75 | 0.75 | 1.0  | 1.0  | 1.5  |      |      |      |  |
| Area (mm <sup>2</sup> )  | 1.0 | 0.25 | 1.0  | 0.6  | 0.75 | 1.31 |      |      |      |  |

Abbreviations: red\*, CTB-Alexa 555 labeled patch; green\*, CTB-Alexa 448 labeled patch; silver\*, CTB-gold-labeled patch. In this table, patch was defined by histologically. See Results section for definition of histological patches; r + Arabic number, red patch + Arabic number; g + Arabic number, green patch + Arabic number; s + Arabic number, silver patch + Arabic number (see Figure 2, 6, 3S, 5S); X axis is an axis along with dorsal bank of PMTS in 2 dimensional unfolded maps. Y axis is an axis perpendicular to X axis.

## Supplementary Table S2. Summary of patch size for each tracer in TEO of M1, M2, and M3

| M1                                        |      |      |        |         |         |
|-------------------------------------------|------|------|--------|---------|---------|
|                                           | Mean | STD  | Median | Maximum | Minimum |
| red*<br>(9 patches)                       |      |      |        |         |         |
| <sup>±</sup> long axis (mm) <sup>±</sup>  | 1.40 | 0.58 | 1.25   | 2.75    | 0.75    |
| <sup>±</sup> short axis (mm) <sup>±</sup> | 0.97 | 0.66 | 0.75   | 2.50    | 0.50    |
| Area (mm <sup>2</sup> )                   | 2.10 | 2.00 | 1.0    | 6.75    | 0.75    |
| green*<br>(10 patches)                    |      |      |        |         |         |
| <sup>±</sup> long axis (mm) <sup>±</sup>  | 1.30 | 0.61 | 1.25   | 2.75    | 0.50    |
| <sup>±</sup> short axis (mm) <sup>±</sup> | 0.93 | 0.64 | 1.25   | 2.50    | 0.50    |
| Area (mm <sup>2</sup> )                   | 1.98 | 1.90 | 1.0    | 6.75    | 0.75    |
| silver*<br>(7 patches)                    |      |      |        |         |         |
| <sup>±</sup> long axis (mm) <sup>±</sup>  | 1.06 | 0.22 | 1.00   | 1.50    | 0.75    |
| <sup>±</sup> short axis (mm) <sup>±</sup> | 0.72 | 0.16 | 0.75   | 1.00    | 0.50    |
| Area (mm <sup>2</sup> )                   | 0.61 | 0.20 | 0.56   | 1.00    | 0.38    |

Abbreviation: Red\*, CTB-Alexa555 labeled patches; green\*, CTB-Alexa448 labeled patches; silver\*, CTB-gold-labeled patches.

<sup>±</sup>: Long and short axis are longer or shorter axis comparing X and Y axis. X axis is an axis along with dorsal bank of PMTS in 2 dimensional unfolded maps. Y axis is an axis perpendicular to X axis.

| M2                                        |      |      |        |         |         |
|-------------------------------------------|------|------|--------|---------|---------|
|                                           | Mean | STD  | Median | Maximum | Minimum |
| red*<br>(6 patches)                       |      |      |        |         |         |
| <sup>±</sup> long axis (mm) <sup>±</sup>  | 1.08 | 0.44 | 0.75   | 1.75    | 0.75    |
| <sup>±</sup> short axis (mm) <sup>±</sup> | 0.88 | 0.31 | 0.75   | 1.50    | 0.75    |
| Area (mm <sup>2</sup> )                   | 1.56 | 0.7  | 1.31   | 2.75    | 1.0     |
| green*<br>(8 patches)                     |      |      |        |         |         |
| <sup>±</sup> long axis (mm) <sup>±</sup>  | 0.91 | 0.35 | 0.88   | 1.5     | 0.50    |
| <sup>±</sup> short axis (mm) <sup>±</sup> | 0.78 | 0.25 | 0.75   | 1.25    | 0.50    |
| Area (mm <sup>2</sup> )                   | 1.23 | 0.84 | 1.06   | 2.75    | 0.25    |
| silver*<br>(6 patches)                    |      |      |        |         |         |
| <sup>±</sup> long axis (mm) <sup>±</sup>  | 1.08 | 0.52 | 1.00   | 2.00    | 0.50    |
| <sup>±</sup> short axis (mm) <sup>±</sup> | 0.75 | 0.22 | 0.75   | 1.00    | 0.50    |
| Area (mm <sup>2</sup> )                   | 0.81 | 0.38 | 0.86   | 1.31    | 0.25    |

| M3                                        |      |      |        |         |         |
|-------------------------------------------|------|------|--------|---------|---------|
|                                           | Mean | STD  | Median | Maximum | Minimum |
| red*<br>(6 patches)                       |      |      |        |         |         |
| <sup>±</sup> long axis (mm) <sup>±</sup>  |      | 0.47 | 1.50   | 2.00    | 0.75    |
| <sup>±</sup> short axis (mm) <sup>±</sup> | 1.50 | 0.43 | 0.75   | 1.75    | 0.75    |
| Area (mm <sup>2</sup> )                   | 1.08 | 1.45 | 1.44   | 4.63    | 1.0     |
| green*<br>(8 patches)                     | 2.03 |      |        |         |         |
| <sup>±</sup> long axis (mm) <sup>±</sup>  |      | 0.47 | 0.75   | 1.5     | 0.50    |
| <sup>±</sup> short axis (mm) <sup>±</sup> | 1.11 | 0.44 | 0.65   | 1.25    | 0.50    |
| Area (mm <sup>2</sup> )                   | 0.82 | 1.48 | 1.25   | 4.63    | 0.25    |
| silver*<br>(6 patches)                    | 1.83 |      |        |         |         |
| <sup>±</sup> long axis (mm) <sup>±</sup>  |      | 0.31 | 1.00   | 1.50    | 0.50    |
| <sup>±</sup> short axis (mm) <sup>±</sup> | 1.13 | 0.25 | 0.63   | 1.00    | 0.50    |
| Area (mm <sup>2</sup> )                   | 0.81 | 0.36 | 0.50   | 1.13    | 0.25    |
|                                           | 0.63 |      |        |         |         |



**Supplementary Table S3. Summary of distance among the same colored patches in whole TEO area**

| The center-to-center distance between a patch and all of its surrounding neighbors (mm)<br>Mean $\pm$ SD | The distance to the nearest neighbor from each patch (mm)<br>Mean $\pm$ SD |
|----------------------------------------------------------------------------------------------------------|----------------------------------------------------------------------------|
| M1                                                                                                       |                                                                            |
| red* (9 patches)                                                                                         |                                                                            |
| 2.90 $\pm$ 0.95                                                                                          | 1.62 $\pm$ 0.50                                                            |
| green* (10 patches)                                                                                      |                                                                            |
| 2.98 $\pm$ 1.05                                                                                          | 1.70 $\pm$ 0.51                                                            |
| silver* (7 patches)                                                                                      |                                                                            |
| 3.10 $\pm$ 0.75                                                                                          | 1.81 $\pm$ 0.42                                                            |
| M2                                                                                                       |                                                                            |
| red* (6 patches)                                                                                         |                                                                            |
| 3.02 $\pm$ 0.98                                                                                          | 1.67 $\pm$ 0.52                                                            |
| green* (8 patches)                                                                                       |                                                                            |
| 3.15 $\pm$ 1.01                                                                                          | 1.72 $\pm$ 0.58                                                            |
| silver* (6 patches)                                                                                      |                                                                            |
| 3.20 $\pm$ 0.95                                                                                          | 1.82 $\pm$ 0.53                                                            |
| M3                                                                                                       |                                                                            |
| red* (6 patches)                                                                                         |                                                                            |
| 3.30 $\pm$ 1.15                                                                                          | 1.72 $\pm$ 0.53                                                            |
| green* (8 patches)                                                                                       |                                                                            |
| 3.40 $\pm$ 1.22                                                                                          | 1.78 $\pm$ 0.57                                                            |
| silver* (6 patches)                                                                                      |                                                                            |
| 3.31 $\pm$ 1.05                                                                                          | 1.68 $\pm$ 0.52                                                            |

red\*, CTB-Alexa555 labeled patches; green\*, CTB-Alexa448 labeled patches; silver\*, CTB-gold-labeled patches.

**Supplementary Table S4. Correlation coefficient between numbers of two different colors of neurons in a each pixel in all whole TEO area.**

| Correlation Coefficeint ( <i>r</i> ) |
|--------------------------------------|
| M1 (1121 pixels examined)            |
| Red and Green                        |
| 0.97***                              |
| Red and Silver                       |
| -0.63**                              |
| Green and Silver                     |
| -0.61**                              |
| M2 (1246 pixels examined)            |
| Red and Green                        |
| 0.93***                              |
| Red and Silver                       |
| -0.60**                              |
| Green and Silver                     |
| -0.60**                              |
| M3 (1296 pixels examined)            |
| Red and Green                        |
| 0.96***                              |
| Red and Silver                       |
| -0.60**                              |
| Green and Silver                     |
| -0.56**                              |

red\*, CTB-Alexa 555 labeled patches; green\*, CTB-Alexa 448 labeled patches; silver\*, CTB-gold-labeled patches.

\*\*\*:  $p < 0.01$  (positive statistical significance by Spearman's rank correlation coefficient)

\*\* :  $p < 0.01$  (negative statistical significance by Spearman's rank correlation coefficient)

**Supplementary Table S5: Number of CTB-Alexa 488 and/or Alexa 555 labeled neurons near CTB-Alexa 488 injection sites (from center to 250  $\mu\text{m}$  and the area between 250  $\mu\text{m}$  and 500  $\mu\text{m}$ ).**

| Distance from center of CTB-Alexa 488 injection site | 250 $\mu\text{m}$ | 250 -500 $\mu\text{m}$ | 250 $\mu\text{m}$ | 250-500 $\mu\text{m}$ | 250 $\mu\text{m}$ | 250-500 $\mu\text{m}$ |
|------------------------------------------------------|-------------------|------------------------|-------------------|-----------------------|-------------------|-----------------------|
| monkey                                               | M1                |                        | M2                |                       | M3                |                       |
| <b>SGL</b>                                           |                   |                        |                   |                       |                   |                       |
| Red (r)                                              | 125               | 130                    | 114               | 92                    | 103               | 140                   |
| green (g)                                            | 3110              | 140                    | 2159              | 127                   | 3028              | 152                   |
| DL(r+g)                                              | 103               | 8                      | 91                | 5                     | 100               | 9                     |
| total                                                | 3338              | 278                    | 2365              | 225                   | 3231              | 302                   |
| DL(r+g)/total (%)                                    | 3                 | 3                      | 4                 | 2                     | 3                 | 3                     |
| DL(r+g)/g (%)                                        | 3                 | 6                      | 4                 | 4                     | 3                 | 6                     |
| DL(r+g)/r (%)                                        | 82                | 6                      | 79                | 6                     | 97                | 7                     |
| <b>IGL</b>                                           |                   |                        |                   |                       |                   |                       |
| red (r)                                              | 38                | 43                     | 32                | 27                    | 32                | 45                    |
| green (g)                                            | 843               | 42                     | 675               | 38                    | 934               | 49                    |
| DL(r+g)                                              | 32                | 2                      | 29                | 2                     | 30                | 3                     |
| total                                                | 914               | 87                     | 736               | 66                    | 996               | 97                    |
| DL(r+g)/total (%)                                    | 4                 | 3                      | 4                 | 2                     | 3                 | 3                     |
| DL(r+g)/g (%)                                        | 4                 | 6                      | 4                 | 4                     | 3                 | 5                     |
| DL(r+g)/r (%)                                        | 84                | 6                      | 91                | 6                     | 96                | 6                     |

Abbreviations: g, number of green neurons; DL (r+g), number of neurons double-labeled by red and green; IGL, infragranular layer, number of red neurons; SGL, supragranular layer; total, r+g.

**Supplementary Table S6: Summary of labeled neurons in each red/green overlapped patch and pixel of TEO in M1.**

|                    | Total | r1, g1 | r2, g2 | r3, g3 | r4, g4 | r5, g5 | r6, g6 | r7, g7 | r8, g8 | r9, g9 | Summary of each pixel | means  | SD    | Median | maximum | minimum |
|--------------------|-------|--------|--------|--------|--------|--------|--------|--------|--------|--------|-----------------------|--------|-------|--------|---------|---------|
| Number of pixels   | 167   | 59     | 30     | 6      | 18     | 8      | 8      | 10     | 9      | 6      |                       |        |       |        |         |         |
| Layer 2            |       |        |        |        |        |        |        |        |        |        |                       |        |       |        |         |         |
| r                  | 1192  | 450    | 244    | 50     | 132    | 69     | 59     | 82     | 60     | 45     |                       | 7.14   | 0.62  | 7      | 10      | 0       |
| g                  | 1873  | 700    | 367    | 72     | 235    | 94     | 104    | 122    | 103    | 77     |                       | 11.21  | 0.97  | 11     | 16      | 0       |
| DL(r+g)            | 2     | 1      | 1      | 0      | 0      | 0      | 0      | 0      | 0      | 0      |                       | 0.01   | 0     | 0      | 2       | 0       |
| total              | 3067  | 1151   | 612    | 122    | 367    | 163    | 163    | 204    | 163    | 122    |                       | 18.36  | 1.65  | 17     | 26      | 5       |
| DL(r+g) /total (%) | 0.07  | 0.09   | 0.16   | 0.00   | 0.00   | 0.00   | 0.00   | 0.00   | 0.00   | 0.00   |                       | 0.07   | 0.00  | 0.07   | 0.14    | 0.00    |
| r/(r+g)(%)         | 38    | 39     | 40     | 41     | 36     | 43     | 36     | 40     | 37     | 37     |                       | 39     | 0.07  | 0.40   | 0.56    | 0.00    |
| Layer 3a           |       |        |        |        |        |        |        |        |        |        |                       |        |       |        |         |         |
| r                  | 2667  | 892    | 577    | 122    | 326    | 151    | 144    | 192    | 149    | 112    |                       | 15.97  | 1.22  | 15     | 30      | 5       |
| g                  | 2491  | 990    | 468    | 87     | 301    | 127    | 135    | 156    | 130    | 97     |                       | 14.92  | 1.45  | 15     | 32      | 7       |
| DL(r+g)            | 6     | 2      | 1      | 1      | 0      | 1      | 1      | 0      | 0      | 0      |                       | 0.04   | 0     | 0      | 4       | 0       |
| total              | 5164  | 1884   | 1047   | 210    | 627    | 280    | 280    | 349    | 279    | 209    |                       | 30.92  | 2.7   | 30     | 42      | 21      |
| DL(r+g) /total (%) | 0.12  | 0.11   | 0.10   | 0.48   | 0.00   | 0.36   | 0.36   | 0.00   | 0.00   | 0.00   |                       | 0.12   | 0     | 0      | 0.18    | 0       |
| r/(r+g)(%)         | 51    | 47     | 55     | 59     | 52     | 54     | 52     | 55     | 54     | 54     |                       | 52     | 11.00 | 45.00  | 71.00   | 25.00   |
| Layer 3b           |       |        |        |        |        |        |        |        |        |        |                       |        |       |        |         |         |
| r                  | 2526  | 900    | 489    | 117    | 292    | 152    | 133    | 203    | 137    | 102    |                       | 15.13  | 0.10  | 15.00  | 42.00   | 10.00   |
| g                  | 2687  | 1002   | 568    | 94     | 342    | 130    | 149    | 149    | 145    | 109    |                       | 16.09  | 1.22  | 16     | 35      | 8       |
| DL(r+g)            | 2     | 3      | 2      | 0      | 1      | 1      | 0      | 1      | 1      | 1      |                       | 0.06   | 0     | 0      | 4       | 0       |
| total              | 5225  | 1905   | 1059   | 212    | 635    | 283    | 282    | 354    | 283    | 212    |                       | 31.29  | 1.38  | 31     | 55      | 21      |
| DL(r+g) /total (%) | 0.19  | 0.16   | 0.19   | 0.00   | 0.16   | 0.35   | 0.00   | 0.28   | 0.35   | 0.47   |                       | 0.19   | 0     | 0      | 0.23    | 0       |
| r/(r+g)(%)         | 49    | 47     | 46     | 56     | 46     | 54     | 47     | 58     | 48     | 48     |                       | 48     | 4.00  | 48     | 60      | 30      |
| Layer 3c           |       |        |        |        |        |        |        |        |        |        |                       |        |       |        |         |         |
| r                  | 3124  | 1200   | 684    | 113    | 346    | 187    | 152    | 178    | 151    | 113    |                       | 18.71  | 0.10  | 18.00  | 28.00   | 10.00   |
| g                  | 2906  | 1000   | 539    | 132    | 387    | 139    | 174    | 229    | 175    | 131    |                       | 20.27  | 1.68  | 20     | 34      | 12      |
| DL(r+g)            | 11    | 5      | 2      | 1      | 1      | 0      | 1      | 0      | 1      | 0      |                       | 0.07   | 0     | 0      | 1       | 0       |
| total              | 6045  | 2206   | 1224   | 245    | 734    | 327    | 328    | 407    | 328    | 244    |                       | 36.20  | 1.25  | 36     | 51      | 26      |
| DL(r+g) /total (%) | 0.18  | 0.23   | 0.16   | 0.41   | 0.14   | 0.00   | 0.30   | 0.00   | 0.30   | 0.00   |                       | 0.18   | 0     | 0      | 0.21    | 0       |
| r/(r+g)(%)         | 51    | 55     | 56     | 46     | 47     | 57     | 47     | 44     | 46     | 46     |                       | 48.00  | 4.23  | 48     | 60      | 38      |
| Layer 5a           |       |        |        |        |        |        |        |        |        |        |                       |        |       |        |         |         |
| r                  | 1446  | 520    | 295    | 59     | 177    | 79     | 79     | 98     | 79     | 59     |                       | 8.66   | 0.72  | 9      | 13      | 4       |
| g                  | 1569  | 580    | 316    | 63     | 189    | 84     | 84     | 105    | 84     | 63     |                       | 9.38   | 0.80  | 9      | 11      | 4       |
| DL(r+g)            | 4     | 2      | 2      | 0      | 0      | 0      | 0      | 0      | 0      | 0      |                       | 0.02   | 0     | 0      | 1       | 0       |
| total              | 3020  | 1103   | 613    | 122    | 367    | 163    | 163    | 204    | 163    | 122    |                       | 18.08  | 1.72  | 18     | 38      | 12      |
| DL(r+g) /total (%) | 0.13  | 0.18   | 0.33   | 0.00   | 0.00   | 0.00   | 0.00   | 0.00   | 0.00   | 0.00   |                       | 0.13   | 0     | 0      | 0.20    | 0       |
| r/(r+g)(%)         | 48    | 47     | 48     | 48     | 48     | 48     | 48     | 48     | 48     | 48     |                       | 48.00  | 5.01  | 0.48   | 0.63    | 0.32    |
| Layer 5b           |       |        |        |        |        |        |        |        |        |        |                       |        |       |        |         |         |
| r                  | 1662  | 610    | 336    | 67     | 201    | 90     | 90     | 112    | 90     | 67     |                       | 9.95   | 0.84  | 4      | 6       | 3       |
| g                  | 1764  | 640    | 359    | 72     | 215    | 96     | 96     | 120    | 96     | 72     |                       | 10.56  | 0.81  | 5      | 6       | 3       |
| DL(r+g)            | 3     | 2      | 1      | 0      | 0      | 0      | 0      | 0      | 0      | 0      |                       | 0.02   | 0     | 0      | 1       | 0       |
| total              | 3428  | 1252   | 694    | 139    | 417    | 185    | 185    | 231    | 185    | 139    |                       | 20.53  | 2.00  | 25     | 31      | 17      |
| DL(r+g) /total (%) | 0.09  | 0.16   | 0.14   | 0.00   | 0.00   | 0.00   | 0.00   | 0.00   | 0.00   | 0.00   |                       | 0.09   | 0     | 0      | 0.15    | 0       |
| r/(r+g)(%)         | 48    | 49     | 48     | 48     | 48     | 48     | 48     | 48     | 48     | 48     |                       | 49     | 5.02  | 0.49   | 0.64    | 0.34    |
| Layer 6            |       |        |        |        |        |        |        |        |        |        |                       |        |       |        |         |         |
| r                  | 1634  | 600    | 351    | 71     | 183    | 89     | 82     | 109    | 85     | 64     |                       | 9.79   | 0.77  | 4      | 6       | 3       |
| g                  | 1710  | 620    | 327    | 65     | 224    | 92     | 98     | 116    | 95     | 72     |                       | 10.24  | 0.82  | 4      | 6       | 3       |
| DL(r+g)            | 4     | 3      | 1      | 0      | 0      | 0      | 0      | 0      | 0      | 0      |                       | 0.02   | 0     | 0      | 1       | 0       |
| total              | 3347  | 1223   | 678    | 136    | 407    | 181    | 181    | 226    | 181    | 136    |                       | 20.04  | 1.85  | 20     | 32      | 12      |
| DL(r+g) /total (%) | 0.12  | 0.25   | 0.15   | 0.00   | 0.00   | 0.00   | 0.00   | 0.00   | 0.00   | 0.00   |                       | 0.12   | 0     | 0      | 0.20    | 0       |
| r/(r+g)(%)         | 50    | 49     | 52     | 52     | 45     | 49     | 46     | 48     | 47     | 47     |                       | 49     | 5.12  | 0.49   | 0.65    | 0.34    |
| Whole Layer        |       |        |        |        |        |        |        |        |        |        |                       |        |       |        |         |         |
| r                  | 11725 | 4272   | 2487   | 482    | 1367   | 665    | 606    | 772    | 614    | 461    |                       | 70.21  | 7.50  | 70     | 90      | 58      |
| g                  | 14999 | 5532   | 2943   | 584    | 1892   | 761    | 840    | 998    | 828    | 621    |                       | 89.82  | 8.01  | 90     | 105     | 75      |
| DL(r+g)            | 40    | 18     | 10     | 2      | 2      | 2      | 2      | 1      | 2      | 1      |                       | 0.24   | 0.00  | 0      | 1       | 0       |
| total              | 29295 | 10724  | 5927   | 1187   | 3553   | 1581   | 1581   | 1975   | 1581   | 1185   |                       | 175.42 | 17.54 | 176    | 200     | 151     |
| DL(r+g) /total (%) | 0.14  | 0.17   | 0.17   | 0.17   | 0.06   | 0.13   | 0.13   | 0.05   | 0.13   | 0.08   |                       | 0.14   | 0.00  | 0      | 0.20    | 0       |
| r/(r+g)(%)         | 47    | 44     | 46     | 45     | 42     | 47     | 42     | 44     | 43     | 43     |                       | 44     | 4.21  | 44     | 54      | 34      |

Abbreviations: DL(r+g), number of neurons double-labeled for red and green; g, number of green neuron; g+number, green patch number; r, number of red neurons; r+number, red patch number; total, r+g.

**Supplementary Table S7: Summary of labeled neurons in each red/green overlapped patch and pixel of TEO in M2.**

|                       | Total | r1, g1 | r2, g2 | R3, g3 | r4, g4 | r5, g5 | r6, g6 | Summary of each pixel | means  | SD    | Median | maximum | minimum |
|-----------------------|-------|--------|--------|--------|--------|--------|--------|-----------------------|--------|-------|--------|---------|---------|
| Number of pixels      | 167   | 0      | 16     | 22     | 8      | 9      | 12     |                       |        |       |        |         |         |
| Layer 2               |       |        |        |        |        |        |        |                       |        |       |        |         |         |
| r                     | 540   | 0      | 103    | 159    | 49     | 70     | 78     |                       | 3.24   | 0.28  | 3      | 5       | 1       |
| g                     | 906   | 0      | 223    | 290    | 114    | 113    | 167    |                       | 5.43   | 0.42  | 5      | 8       | 2       |
| DL(r+g)               | 1     | 0      | 0      | 0      | 1      | 0      | 0      |                       | 1      | 0     | 0      | 1       | 0       |
| total                 | 1450  | 0      | 326    | 448    | 163    | 183    | 244    |                       | 8.68   | 1.65  | 17     | 26      | 5       |
| DL(r+g) /total (%)    | 0.07  | 0      | 0.00   | 0.00   | 0.61   | 0.00   | 0.00   |                       | 0.07   | 0     | 0.07   | 0.14    | 0.00    |
| r/(r+g)(%)            | 37    | 0      | 32     | 35     | 30     | 38     | 32     |                       | 37     | 0.07  | 0.40   | 0.56    | 0.00    |
| Layer 3a              |       |        |        |        |        |        |        |                       |        |       |        |         |         |
| r                     | 3039  | 0      | 300    | 405    | 125    | 178    | 204    |                       | 18.20  | 1.22  | 18     | 30      | 10      |
| g                     | 2886  | 0      | 257    | 362    | 153    | 136    | 214    |                       | 17.28  | 1.45  | 17     | 32      | 7       |
| DL(r+g)               | 6     | 0      | 1      | 1      | 1      | 2      | 1      |                       | 4      | 0     | 0      | 4       | 0       |
| total                 | 5936  | 0      | 561    | 768    | 281    | 318    | 419    |                       | 35.54  | 2.7   | 35     | 42      | 21      |
| DL(r+g) /total (%)    | 0.10  | 0      | 0.18   | 0.13   | 0.36   | 0.63   | 0.24   |                       | 0.10   | 0     | 0      | 0       | 0       |
| r/(r+g)(%)            | 51    | 0      | 54     | 53     | 45     | 57     | 49     |                       | 51     | 11.00 | 45.00  | 71.00   | 25.00   |
| Layer 3b              |       |        |        |        |        |        |        |                       |        |       |        |         |         |
| r                     | 2923  | 0      | 243    | 437    | 127    | 195    | 247    |                       | 17.50  | 1.40  | 18.00  | 25.00   | 9.00    |
| g                     | 3064  | 0      | 320    | 338    | 155    | 122    | 176    |                       | 18.35  | 1.22  | 18     | 28      | 10      |
| DL(r+g)               | 6     | 0      | 2      | 1      | 2      | 0      | 1      |                       | 0.04   | 0     | 0      | 4       | 0       |
| total                 | 5988  | 0      | 564    | 775    | 282    | 317    | 423    |                       | 35.85  | 1.38  | 36     | 51      | 25      |
| DL(r+g) /total (%)    | 0.10  | 0      | 0.35   | 0.13   | 0.71   | 0.00   | 0.24   |                       | 0.10   | 0     | 0      | 0       | 0       |
| r/(r+g)(%)            | 49    | 0      | 43     | 56     | 45     | 61     | 58     |                       | 49     | 4.00  | 48     | 60      | 30      |
| Layer 3c              |       |        |        |        |        |        |        |                       |        |       |        |         |         |
| r                     | 3510  | 0      | 387    | 534    | 194    | 217    | 241    |                       | 21.02  | 1.60  | 21.00  | 31.00   | 11.00   |
| g                     | 3416  | 0      | 265    | 362    | 132    | 150    | 248    |                       | 22.77  | 1.68  | 23     | 33      | 12      |
| DL(r+g)               | 9     | 0      | 1      | 2      | 2      | 2      | 2      |                       | 0.05   | 0     | 0      | 1       | 0       |
| total                 | 6926  | 0      | 652    | 896    | 326    | 367    | 489    |                       | 41.47  | 1.25  | 43     | 72      | 20      |
| DL(r+g) /total (%)    | 0.13  | 0      | 0.15   | 0.22   | 0.61   | 0.55   | 0.41   |                       | 0.13   | 0     | 0      | 0       | 0       |
| r/(r+g)(%)            | 51    | 0      | 59     | 60     | 59     | 59     | 49     |                       | 48.00  | 4.23  | 48     | 60      | 38      |
| Layer 5a              |       |        |        |        |        |        |        |                       |        |       |        |         |         |
| r                     | 1662  | 0      | 182    | 250    | 91     | 102    | 136    |                       | 9.95   | 0.72  | 10     | 15      | 6       |
| g                     | 1801  | 0      | 194    | 267    | 97     | 109    | 146    |                       | 10.78  | 0.80  | 11     | 16      | 7       |
| DL(r+g)               | 4     | 0      | 1      | 0      | 2      | 1      | 0      |                       | 0.02   | 0     | 0      | 1       | 0       |
| total                 | 3463  | 0      | 376    | 517    | 188    | 212    | 282    |                       | 20.74  | 1.72  | 21     | 36      | 12      |
| DL(r+g) /total (%)    | 0.12  | 0      | 0.27   | 0.00   | 1.06   | 0.47   | 0.00   |                       | 0.12   | 0     | 0      | 0.18    | 0       |
| r/(r+g)(%)            | 48    | 0      | 48     | 48     | 48     | 48     | 48     |                       | 48.00  | 5.01  | 0.48   | 0.63    | 0.32    |
| Layer 5b              |       |        |        |        |        |        |        |                       |        |       |        |         |         |
| R                     | 1908  | 0      | 155    | 213    | 77     | 87     | 116    |                       | 11.43  | 0.84  | 12     | 18      | 6       |
| G                     | 2027  | 0      | 165    | 227    | 83     | 93     | 124    |                       | 12.14  | 0.81  | 12     | 17      | 6       |
| DL (R + G)            | 8     | 0      | 2      | 1      | 2      | 2      | 1      |                       | 0.05   | 0     | 0      | 1       | 0       |
| Total                 | 3935  | 0      | 320    | 440    | 160    | 180    | 240    |                       | 23.56  | 2.00  | 25     | 31      | 17      |
| DL (R + G) /total (%) | 0.20  | 0      | 0.63   | 0.23   | 1.25   | 1.11   | 0.42   |                       | 0.20   | 0     | 0      | 0       | 0       |
| R/(R+G)(%)            | 48    | 0      | 48     | 48     | 48     | 48     | 48     |                       | 48     | 5.02  | 49.00  | 64.00   | 34.00   |
| Layer 6               |       |        |        |        |        |        |        |                       |        |       |        |         |         |
| r                     | 1913  | 0      | 175    | 272    | 86     | 108    | 135    |                       | 11.46  | 0.77  | 12     | 19      | 4       |
| g                     | 1928  | 0      | 187    | 225    | 95     | 96     | 136    |                       | 11.54  | 0.82  | 12     | 18      | 5       |
| DL(r+g)               | 4     | 0      | 0      | 1      | 0      | 1      | 2      |                       | 0.02   | 0     | 0      | 1       | 0       |
| total                 | 3841  | 0      | 361    | 497    | 181    | 203    | 271    |                       | 23.00  | 1.85  | 23     | 32      | 12      |
| DL(r+g) /total (%)    | 0.10  | 0      | 0.00   | 0.20   | 0.00   | 0.49   | 0.74   |                       | 0.10   | 0     | 0      | 0       | 0       |
| r/(r+g)(%)            | 50    | 0      | 48     | 55     | 47     | 53     | 50     |                       | 50     | 5.12  | 0.49   | 0.65    | 0.34    |
| Whole Layer           |       |        |        |        |        |        |        |                       |        |       |        |         |         |
| r                     | 12573 | 0      | 1545   | 2268   | 749    | 956    | 1157   |                       | 75.29  | 7.50  | 70     | 90      | 58      |
| g                     | 12963 | 0      | 1612   | 2072   | 829    | 819    | 1210   |                       | 77.62  | 8.01  | 90     | 105     | 75      |
| DL(r+g)               | 32    | 0      | 5      | 5      | 8      | 8      | 6      |                       | 0.19   | 0.00  | 0      | 1       | 0       |
| total                 | 25536 | 0      | 3156   | 4340   | 1578   | 1776   | 2367   |                       | 152.91 | 17.54 | 176    | 200     | 151     |
| DL(r+g) /total (%)    | 0.13  | 0      | 0.16   | 0.12   | 0.51   | 0.45   | 0.25   |                       | 0.13   | 0.00  | 0      | 0       | 0       |
| r/(r+g)(%)            | 49    | 0      | 49     | 52     | 47     | 54     | 49     |                       | 49     | 4.21  | 44     | 54      | 34      |

Abbreviations: see Supplementary Table S7.

**Supplementary Table S8: Summary of labeled neurons in each red/green overlapped patch and pixel of TEO in M3.**

|                   | Total | r1,g1 | r2,g2 | r3,g3 | r4,g4 | r5,g5 | r6,g6 | r7,g7 | r8,g8 | Summary of each pixel | means  | SD    | Median | maximum | minimum |
|-------------------|-------|-------|-------|-------|-------|-------|-------|-------|-------|-----------------------|--------|-------|--------|---------|---------|
| Number of pixels  | 122   | 0     | 8     | 8     | 14    | 37    | 10    | 32    | 13    |                       |        |       |        |         |         |
| Layer 2           |       |       |       |       |       |       |       |       |       |                       |        |       |        |         |         |
| r                 | 725   | 0     | 44    | 49    | 74    | 226   | 52    | 208   | 74    |                       | 5.94   | 0.41  | 3      | 7       | 0       |
| g                 | 1716  | 0     | 119   | 114   | 211   | 528   | 151   | 444   | 147   |                       | 14.07  | 1.25  | 6      | 13      | 0       |
| DL(r+g)           | 3     | 0     | 0     | 0     | 1     | 1     | 0     | 1     | 0     |                       | 0.02   | 0.00  | 0      | 1       | 0       |
| total             | 2441  | 0     | 163   | 163   | 285   | 754   | 204   | 652   | 221   |                       | 20.01  | 1.85  | 20     | 26      | 14      |
| DL(r+g)/total (%) | 0.12  | 0     | 0.00  | 0.00  | 0.35  | 0.13  | 0.00  | 0.15  | 0.00  |                       | 0.12   | 0.00  | 0.14   | 0.18    | 0.00    |
| r/(r+g)(%)        | 30    | 0     | 0.27  | 0.30  | 0.26  | 0.30  | 0.26  | 0.32  | 0.28  |                       | 30     | 2.52  | 0.30   | 0.56    | 0.00    |
| Layer 3a          |       |       |       |       |       |       |       |       |       |                       |        |       |        |         |         |
| r                 | 1748  | 0     | 139   | 160   | 247   | 689   | 163   | 208   | 142   |                       | 14.33  | 1.13  | 4      | 6       | 2       |
| g                 | 1824  | 0     | 140   | 119   | 241   | 600   | 185   | 444   | 95    |                       | 14.95  | 1.35  | 4      | 8       | 2       |
| DL(r+g)           | 5     | 0     | 0     | 0     | 0     | 2     | 1     | 1     | 1     |                       | 0.04   | 0.00  | 0      | 1       | 0       |
| total             | 3572  | 0     | 279   | 279   | 488   | 1290  | 349   | 652   | 236   |                       | 29.28  | 2.81  | 30     | 36      | 24      |
| DL(r+g)/total (%) | 0.14  | 0     | 0.35  | 0.13  | 0.00  | 0.15  | 0.00  | 0.00  | 0.00  |                       | 0.14   | 0.00  | 0.14   | 0.26    | 0.07    |
| r/(r+g)(%)        | 49    | 0     | 0.50  | 0.57  | 0.51  | 0.53  | 0.47  | 0.60  | 0.54  |                       | 49     | 4.23  | 0.48   | 0.71    | 0.25    |
| Layer 3b          |       |       |       |       |       |       |       |       |       |                       |        |       |        |         |         |
| r                 | 1732  | 0     | 156   | 158   | 245   | 659   | 164   | 208   | 142   |                       | 14.19  | 1.14  | 14     | 20      | 7       |
| g                 | 1869  | 0     | 126   | 124   | 248   | 644   | 188   | 444   | 95    |                       | 15.32  | 1.29  | 15     | 18      | 7       |
| DL(r+g)           | 3     | 0     | 0     | 0     | 0     | 2     | 1     | 0     | 0     |                       | 0.02   | 0     | 0      | 1       | 0       |
| total             | 3600  | 0     | 282   | 282   | 493   | 1303  | 352   | 652   | 236   |                       | 29.51  | 2.72  | 30     | 37      | 23      |
| DL(r+g)/total (%) | 0.08  | 0     | 0.35  | 0.13  | 0.00  | 0.15  | 0.00  | 0.00  | 0.00  |                       | 0.08   | 0.00  | 0.08   | 0.14    | 0.07    |
| r/(r+g)(%)        | 48    | 0     | 0.55  | 0.56  | 0.50  | 0.51  | 0.47  | 0.65  | 0.54  |                       | 48     | 4.10  | 48.00  | 54.00   | 42.00   |
| Layer 3c          |       |       |       |       |       |       |       |       |       |                       |        |       |        |         |         |
| r                 | 2183  | 0     | 168   | 178   | 303   | 963   | 241   | 208   | 121   |                       | 17.89  | 1.56  | 5      | 8       | 3       |
| g                 | 1838  | 0     | 158   | 148   | 267   | 544   | 166   | 444   | 110   |                       | 15.06  | 1.16  | 4      | 6       | 2       |
| DL(r+g)           | 6     | 0     | 0     | 1     | 1     | 2     | 1     | 1     | 0     |                       | 0.05   | 0.00  | 0      | 1       | 0       |
| total             | 4021  | 0     | 326   | 326   | 570   | 1507  | 407   | 652   | 232   |                       | 32.96  | 3.01  | 33     | 40      | 24      |
| DL(r+g)/total (%) | 0.15  | 0     | 0.35  | 0.13  | 0.00  | 0.15  | 0.00  | 0.00  | 0.00  |                       | 0.15   | 0.00  | 0.15   | 0.20    | 0.07    |
| r/(r+g)(%)        | 54    | 0     | 0.52  | 0.54  | 0.53  | 0.64  | 0.59  | 0.49  | 0.46  |                       | 54     | 4.80  | 54.00  | 60.00   | 0.30    |
| Layer 5a          |       |       |       |       |       |       |       |       |       |                       |        |       |        |         |         |
| r                 | 1039  | 0     | 79    | 79    | 138   | 364   | 98    | 208   | 74    |                       | 8.52   | 0.67  | 9      | 13      | 6       |
| g                 | 1402  | 0     | 84    | 84    | 147   | 389   | 105   | 444   | 147   |                       | 11.49  | 0.74  | 12     | 17      | 6       |
| DL(r+g)           | 4     | 0     | 0     | 0     | 1     | 2     | 0     | 1     | 0     |                       | 0.03   | 0.00  | 0      | 1       | 0       |
| total             | 2441  | 0     | 163   | 163   | 285   | 754   | 204   | 652   | 221   |                       | 20.01  | 1.86  | 20     | 26      | 13      |
| DL(r+g)/total (%) | 0.16  | 0     | 0.35  | 0.13  | 0.00  | 0.15  | 0.00  | 0.00  | 0.00  |                       | 0.16   | 0.00  | 0.16   | 0.20    | 0.08    |
| r/(r+g)(%)        | 43    | 0     | 0.48  | 0.48  | 0.48  | 0.48  | 0.48  | 0.48  | 0.48  |                       | 43     | 0.07  | 0.43   | 0.63    | 0.32    |
| Layer 5b          |       |       |       |       |       |       |       |       |       |                       |        |       |        |         |         |
| r                 | 1143  | 0     | 90    | 90    | 157   | 414   | 112   | 208   | 74    |                       | 9.37   | 0.78  | 9      | 15      | 3       |
| g                 | 1512  | 0     | 96    | 96    | 167   | 442   | 120   | 444   | 147   |                       | 12.39  | 0.75  | 12     | 18      | 4       |
| DL(r+g)           | 5     | 0     | 0     | 0     | 1     | 2     | 0     | 2     | 0     |                       | 0.04   | 0.00  | 0      | 1       | 0       |
| total             | 2655  | 0     | 185   | 185   | 324   | 856   | 231   | 652   | 221   |                       | 21.76  | 2.02  | 22     | 29      | 18      |
| DL(r+g)/total (%) | 0.19  | 0     | 0.35  | 0.13  | 0.00  | 0.15  | 0.00  | 0.00  | 0.00  |                       | 0.19   | 0.00  | 0.19   | 0.23    | 0.16    |
| r/(r+g)(%)        | 43    | 0     | 0.48  | 0.48  | 0.48  | 0.48  | 0.48  | 0.48  | 0.48  |                       | 43     | 4.10  | 0.49   | 0.64    | 0.34    |
| Layer 6           |       |       |       |       |       |       |       |       |       |                       |        |       |        |         |         |
| r                 | 1151  | 0     | 84    | 87    | 147   | 426   | 126   | 208   | 74    |                       | 9.43   | 0.72  | 9      | 16      | 5       |
| g                 | 1461  | 0     | 97    | 94    | 170   | 410   | 100   | 444   | 147   |                       | 11.98  | 0.76  | 12     | 19      | 6       |
| DL(r+g)           | 7     | 0     | 0     | 0     | 1     | 3     | 1     | 2     | 0     |                       | 0.06   | 0.00  | 0      | 1       | 0       |
| total             | 2612  | 0     | 181   | 181   | 316   | 836   | 226   | 652   | 221   |                       | 21.41  | 2.05  | 22     | 27      | 16      |
| DL(r+g)/total (%) | 0.27  | 0     | 0.35  | 0.13  | 0.00  | 0.15  | 0.00  | 0.00  | 0.00  |                       | 0.27   | 0.00  | 0.27   | 0.37    | 0.19    |
| r/(r+g)(%)        | 44    | 0     | 0.47  | 0.48  | 0.46  | 0.51  | 0.56  | 0.56  | 0.47  |                       | 44     | 0.07  | 0.43   | 0.65    | 0.34    |
| Whole Layer       |       |       |       |       |       |       |       |       |       |                       |        |       |        |         |         |
| r                 | 7973  | 0     | 621   | 639   | 1063  | 3052  | 794   | 1245  | 557   |                       | 65.35  | 11.92 | 65     | 90      | 36      |
| g                 | 9798  | 0     | 679   | 660   | 1211  | 2958  | 830   | 2666  | 793   |                       | 80.31  | 13.25 | 80     | 110     | 56      |
| DL(r+g)           | 28    | 0     | 0     | 1     | 5     | 12    | 3     | 7     | 0     |                       | 0.23   | 0.00  | 0      | 1       | 0       |
| total             | 17770 | 0     | 1300  | 1300  | 2274  | 6010  | 1624  | 3911  | 1351  |                       | 145.66 | 27.50 | 145.00 | 190.00  | 105.00  |
| DL(r+g)/total (%) | 0.16  | 0     | 0.00  | 0.08  | 0.22  | 0.20  | 0.18  | 0.18  | 0.00  |                       | 0.16   | 0.00  | 0.14   | 2.10    | 0.12    |
| r/(r+g)(%)        | 45    | 0     | 0.48  | 0.49  | 0.47  | 0.51  | 0.49  | 0.52  | 0.41  |                       | 45     | 4.1   | 46     | 50      | 42      |

Abbreviations: see Supplementary Table S7.

**Supplementary Table S9: Summary of Experiments.**

| Monkey | Injection sites and how to determine these sites |                                                 |                                               | Remarks                                                                 |
|--------|--------------------------------------------------|-------------------------------------------------|-----------------------------------------------|-------------------------------------------------------------------------|
|        | CTB-Alexa 555                                    | CTB-Alexa 488                                   | CTB-gold                                      |                                                                         |
| M1     | TE<br>Using sulcal landmark                      | TEO<br>Bright spots in <i>in vivo</i> SCI image | TEO<br>Dark parts in <i>in vivo</i> SCI image | CTB-Alexa488 and -gold placement was determined with <i>in vivo</i> SCI |
| M2     | Same as above                                    | Same as above                                   | Same as above                                 | Same as above                                                           |
| M3     | Same as above                                    | Same as above                                   | Same as above                                 | Same as above                                                           |
| M4     | TE<br>Using sulcal landmarks                     | Not used                                        | Not used                                      | With DiI placed on bright spots after perfusion                         |
| M5     | TE<br>Using sulcal landmarks                     | TE<br>Using sulcal landmarks                    | TE<br>Using sulcal landmarks                  | Mixture of three tracers was injected                                   |

Abbreviations: CTB, cholera toxin subunit B; SCI, surface connection imaging.
